# Supplementary material
Source: PubMed Central journal article supplement (PMC1820645)
Supplement: pnas_0611713104_5.pdf [file pnas_0611713104_5.pdf]

## SP-CFP-STIM1 as received from the Meyer lab:

Signal peptide 1-22

ECFP 2-238

STIM1 23-661

MDV...GQS

LAPVATMV

SK...LYK

SGSTSLYKKAGS

LSHSH...LKK

## SP-His<sub>6</sub>-CFP-STIM1:

Signal peptide 1-22

His<sub>6</sub>

ECFP 2-238

STIM1 23-661

MDV...GQS

LAPVM

HHHHHH

MV

SK...LYK

SGSTSLYKKAGS

LSHSH...LKK

## SP-His<sub>6</sub>-STIM1-CFP:

Signal peptide 1-22

His<sub>6</sub>

STIM1 24-661

ECFP 2-238

MDV...GQS

LAPV

HHHHHH

SHSH...LKK

RSRGGMV

SK...LYK
