# Supplementary material
Source: PubMed Central journal article supplement (PMC1820645)

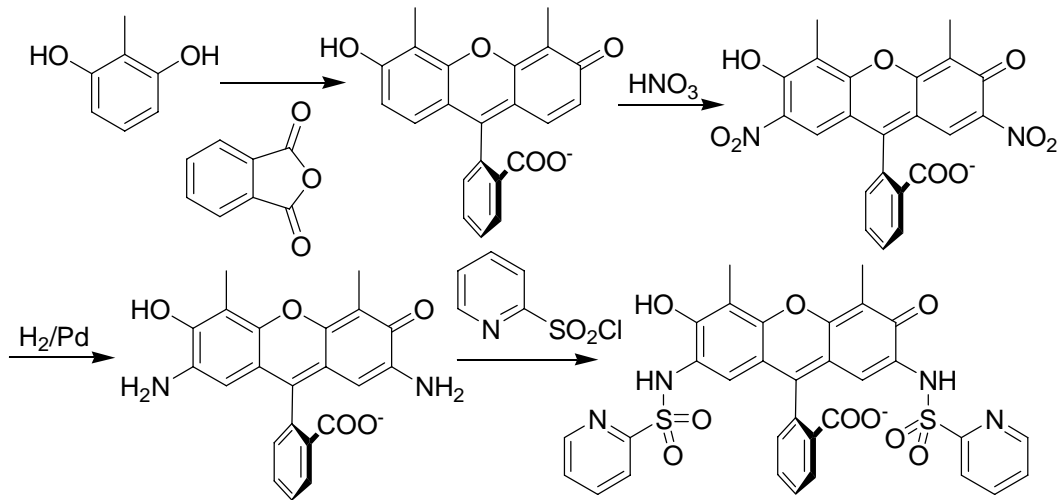

Supplement: pnas_0611713104_1.pdf [file pnas_0611713104_1.pdf]

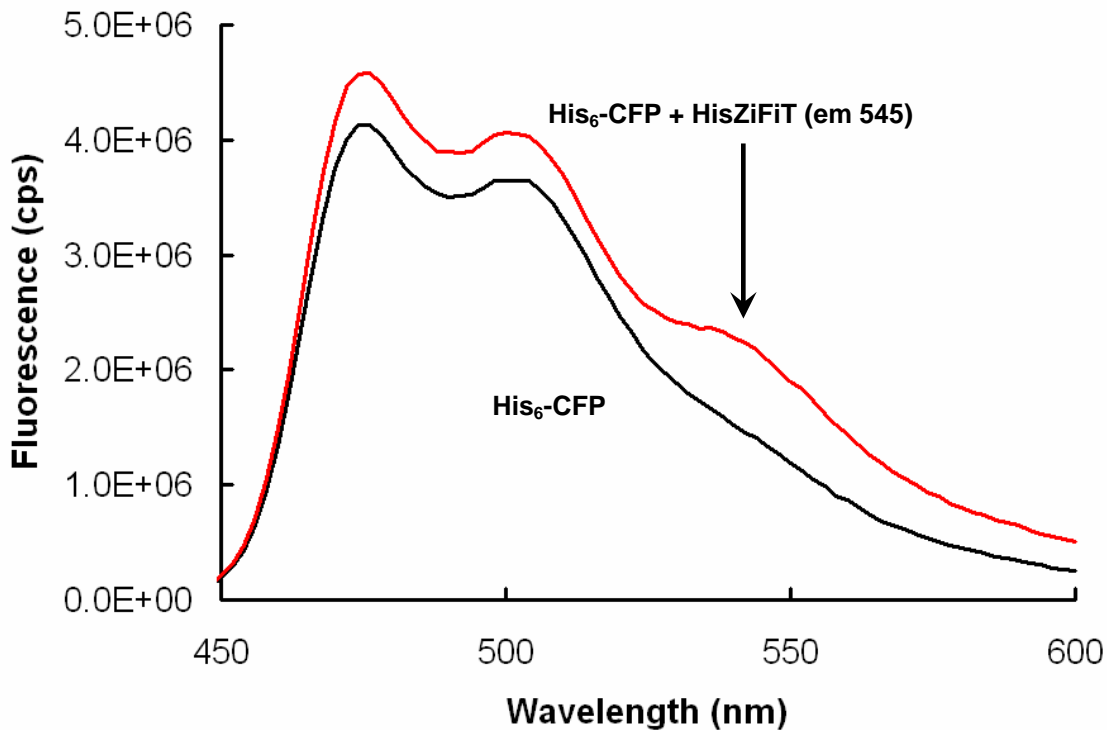

Supplement: pnas_0611713104_2.pdf [file pnas_0611713104_2.pdf]

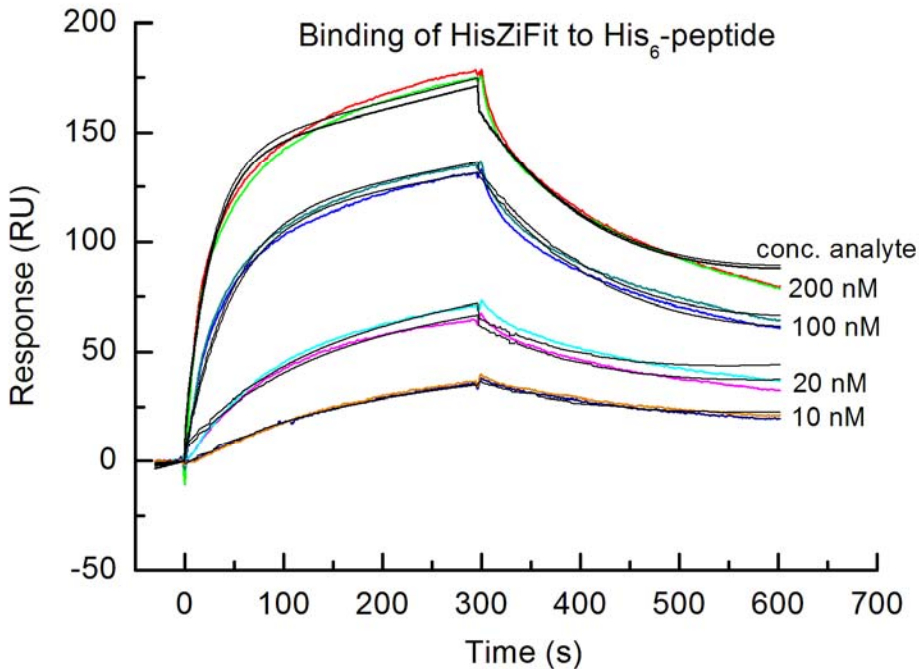

| $k_a$ ( $M^{-1}s^{-1}$ ) | $k_d$ ( $s^{-1}$ ) | $K_A$ ( $M^{-1}$ ) | $K_D$ (M) |
|--------------------------|--------------------|--------------------|-----------|
| 1.56E5                   | 6.25E-3            | 2.49E7             | 4.02E-8   |

Supplement: pnas_0611713104_3.pdf [file pnas_0611713104_3.pdf]

(A,B) no HisZiFiT

(C,D) HisZiFiT

(E,F) EDTA wash

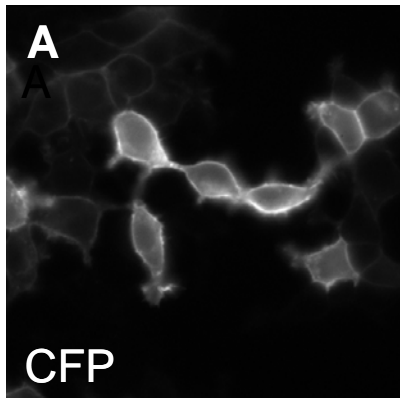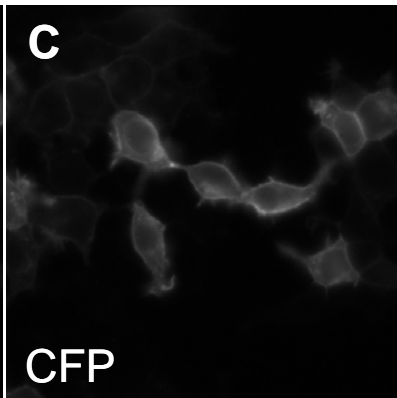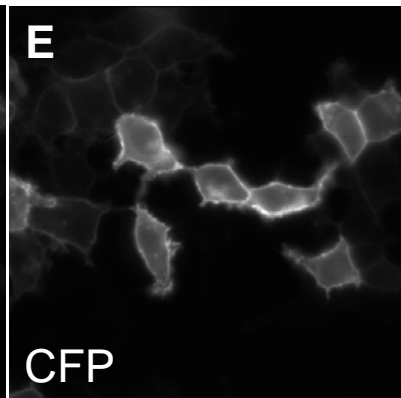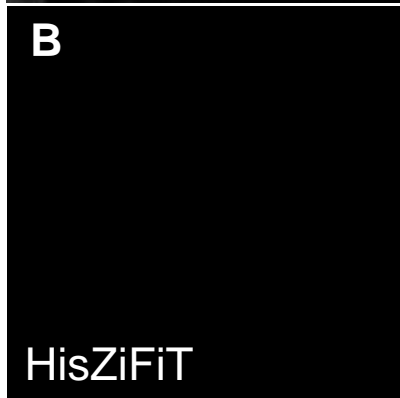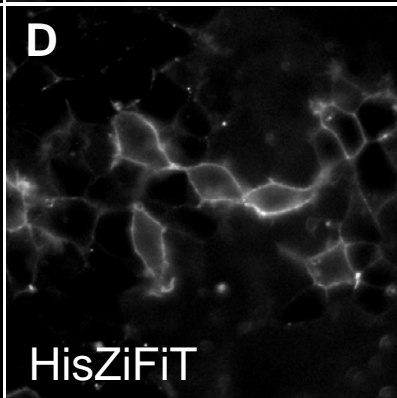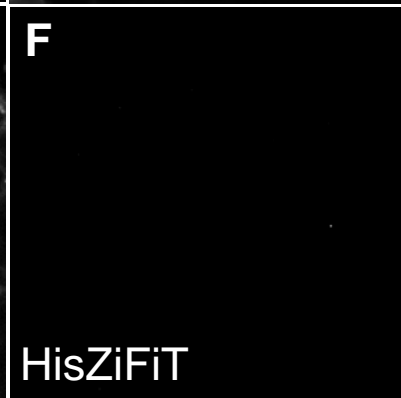

Supplement: pnas_0611713104_4.pdf [file pnas_0611713104_4.pdf]

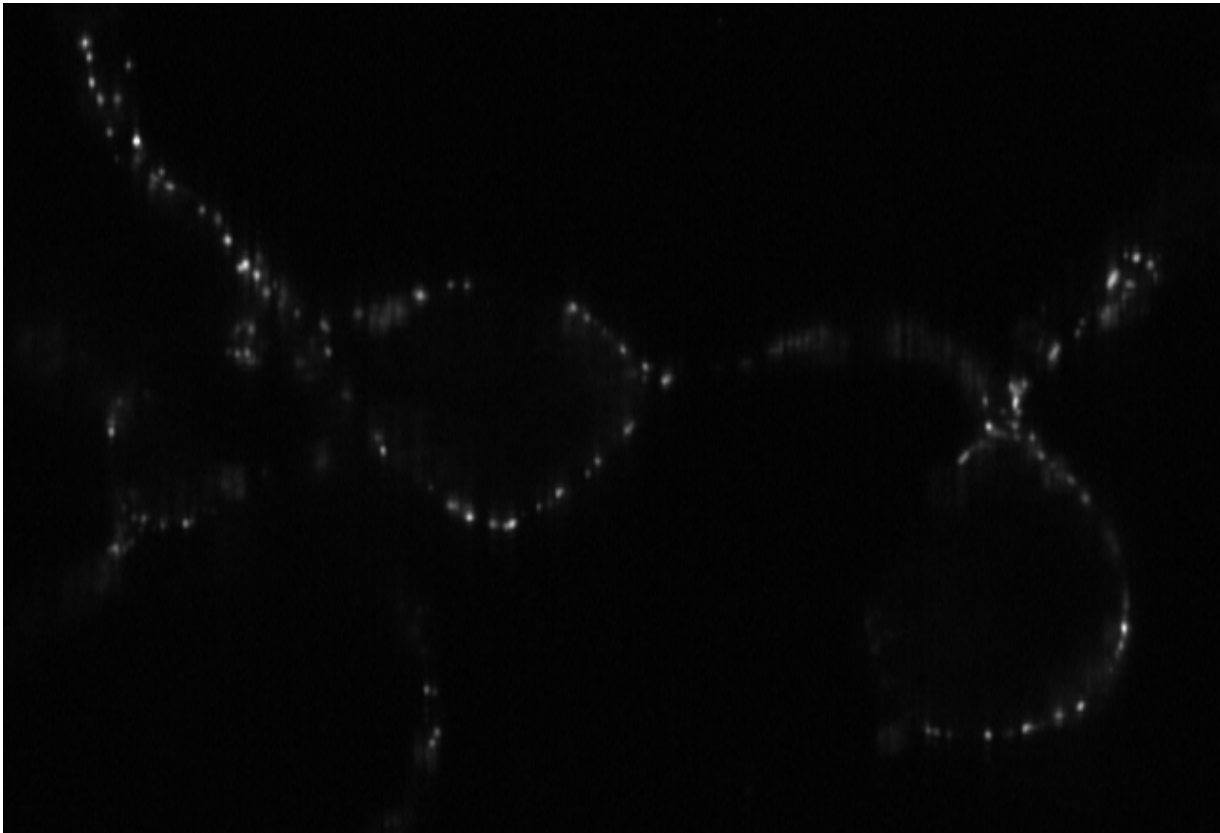

Supplement: pnas_0611713104_6.pdf [file pnas_0611713104_6.pdf]
